# Supplementary material
Source: PubMed Central journal article supplement (PMC4251771)
Supplement: NIHMS606028-supplement-Supplementary_Figures_1-8___Supplemenatary_Tables_1__2_and_5.pdf [file NIHMS606028-supplement-Supplementary_Figures_1-8___Supplemenatary_Tables_1__2_and_5.pdf]

# Supplementary Figures

## Pan-Cancer Genetic Analysis Identifies PARK2 as a Master Regulator of G1/S Cyclins

Yongxing Gong<sup>1</sup>, Travis Ian Zack<sup>2,3,4,5,6</sup>, Luc G.T. Morris<sup>7</sup>, Kan Lin<sup>8</sup>, Ellen Hukkelhoven<sup>9</sup>, Radhika Raheja<sup>9</sup>,  
I-Li Tan<sup>8</sup>, Sevin Turcan<sup>1</sup>, Selvaraju Veeriah<sup>1</sup>, Shasha Meng<sup>1</sup>, Agnes Viale<sup>10</sup>, Steven E. Schumacher<sup>2</sup>,  
Perry Palmedo<sup>2,11</sup>, Rameen Beroukhim<sup>2,3,4,5</sup>, and Timothy A. Chan<sup>1, 12, 13,14</sup>

<sup>1</sup>Human Oncology and Pathogenesis Program, Memorial Sloan-Kettering Center,  
New York, NY 10065, USA

<sup>2</sup>The Broad Institute, Cambridge, MA 02142

<sup>3</sup>Dept. of Cancer Biology, <sup>4</sup>Medical Oncology, and <sup>5</sup>Center for Cancer Genome Characterization,  
Dana-Farber Cancer Institute, Boston, MA 02215

<sup>6</sup>Biophysics Program, Harvard University, Boston, MA 02115

<sup>7</sup>Dept. of Surgery, Memorial Sloan-Kettering Cancer Center, New York, NY 10065, USA.

<sup>8</sup>Weill Cornell College of Medicine, New York, NY 10065.

<sup>9</sup>Molecular Biology Program, <sup>10</sup>Genomics Core, Memorial Sloan-Kettering Cancer Center,  
New York, NY 10065

<sup>11</sup>Center for Biomedical Informatics, Harvard University, Boston, MA 02115

<sup>12</sup>Dept. of Radiation Oncology, <sup>13</sup>Brain Tumor Center, Memorial Sloan-Kettering Cancer Center,  
New York, NY 10065

<sup>14</sup>Correspondence should be addressed to: T.A.C. ([chant@mskcc.org](mailto:chant@mskcc.org))

# Index of Supplementary Figures and Tables

**Supplementary Figure 1.** Examples of *PARK2* locus profiles from distinct cancer lineages.

**Supplementary Figure 2.** *PARK2* regulates cell cycle progression.

**Supplementary Figure 3.** *PARK2* knockdown results in alterations in gene expression.

**Supplementary Figure 4.** Pathway analyses of 2,698 genes differentially expressed across 2 cell lines transfected with *PARK2* siRNAs.

**Supplementary Figure 5.** Gene expression does not change for cyclins D1 and E1 after *PARK2* knockdown.

**Supplementary Figure 6.** *PARK2* knockdown causes accumulation of cyclin D2 and D3 protein.

**Supplementary Figure 7.** Immunoprecipitation assays show binding of wild-type *PARK2* to endogenous cyclins D2 and D3.

**Supplementary Figure 8.** Patterns of genetic alteration of *FBXW7* and *PARK2* in colorectal cancer.

**Supplementary Table 1.** Pan-cancer regions of significant SCNA and *PARK2* anticorrelates.

**Supplementary Table 2.** Significance of *PARK2* anticorrelates.

**Supplementary Table 3.** Gene expression changes after *PARK2* knockdown.

**Supplementary Table 4.** Pathway analyses based on genes differentially expressed after *PARK2* knockdown.

**Supplementary Table 5.** Quantitative RT-PCR Primer and siRNA target sequences.

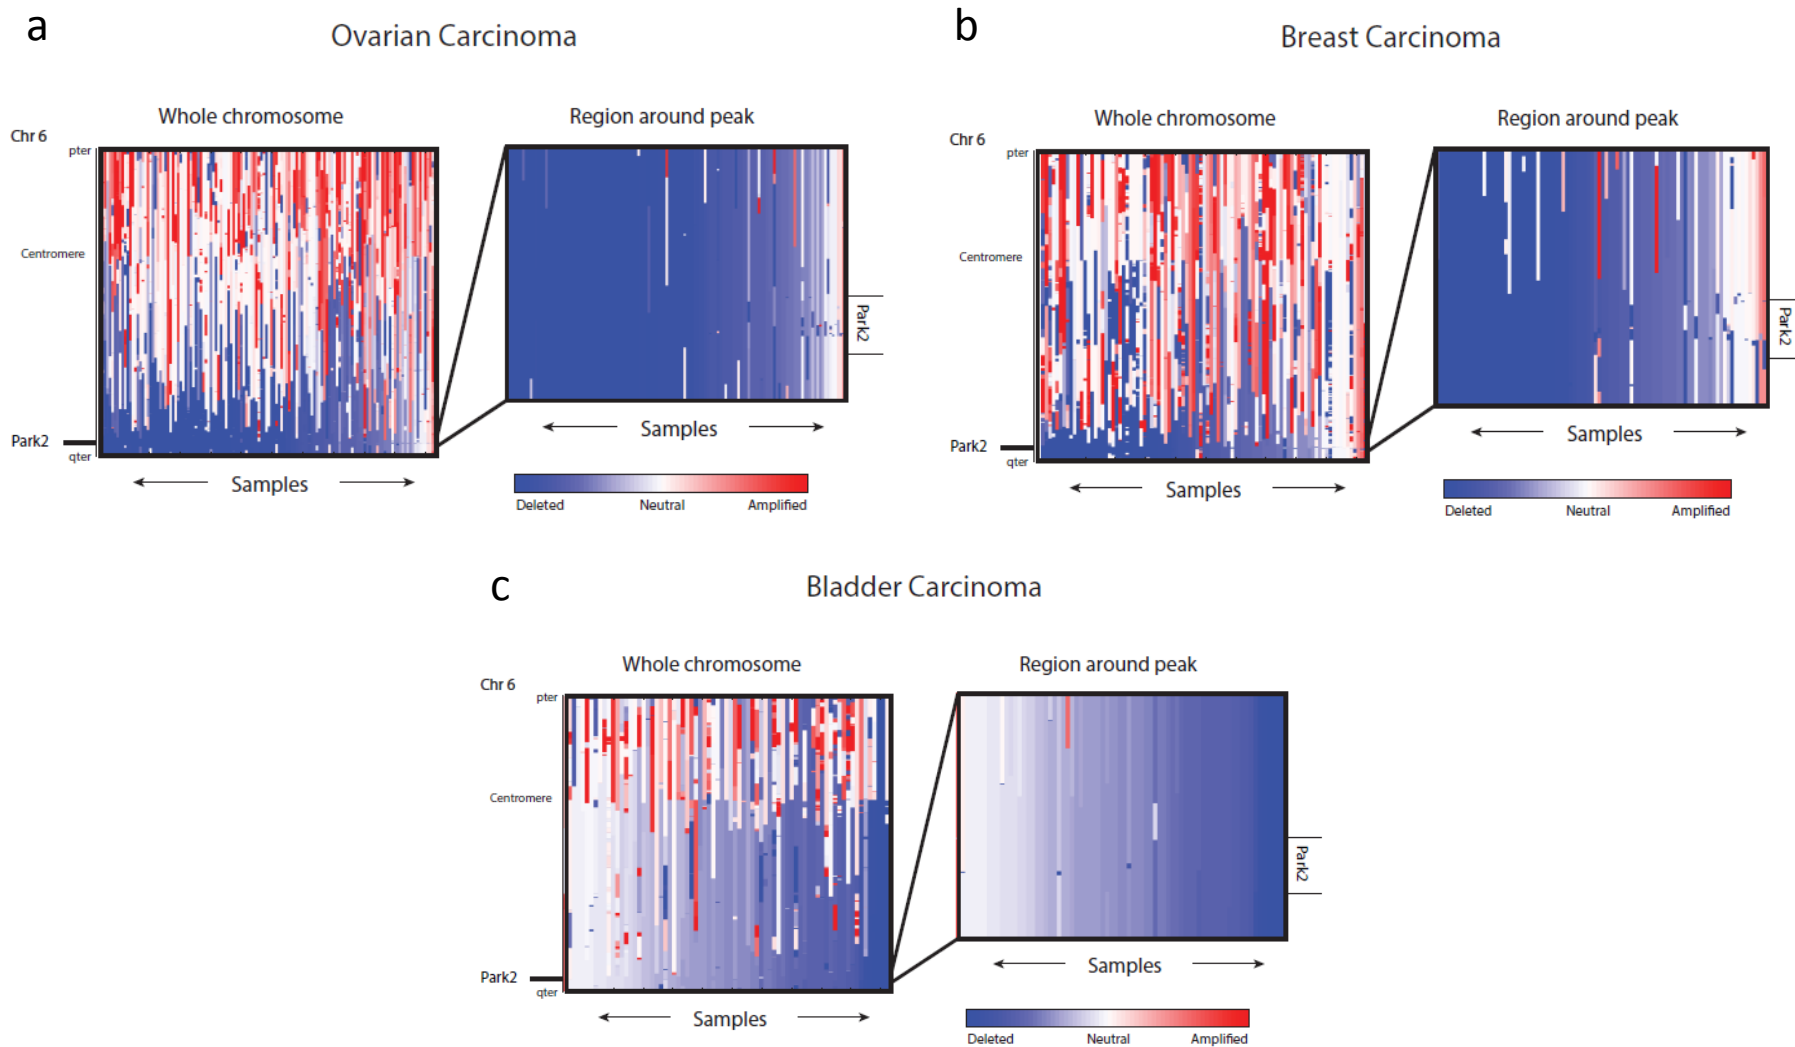

**Supplementary Figure 1** Examples of *PARK2* locus profiles from distinct cancer lineages. Copy number data from the TCGA. Representative types of malignancies are shown. SCNA profiles of chromosome 6 (left) and a 5Mb region surrounding *PARK2* (right) are shown in the three lineages that had the highest frequency of *PARK2* deletions: ovarian cancer (**a**), breast cancer (**b**), and bladder cancer (**c**).

T202

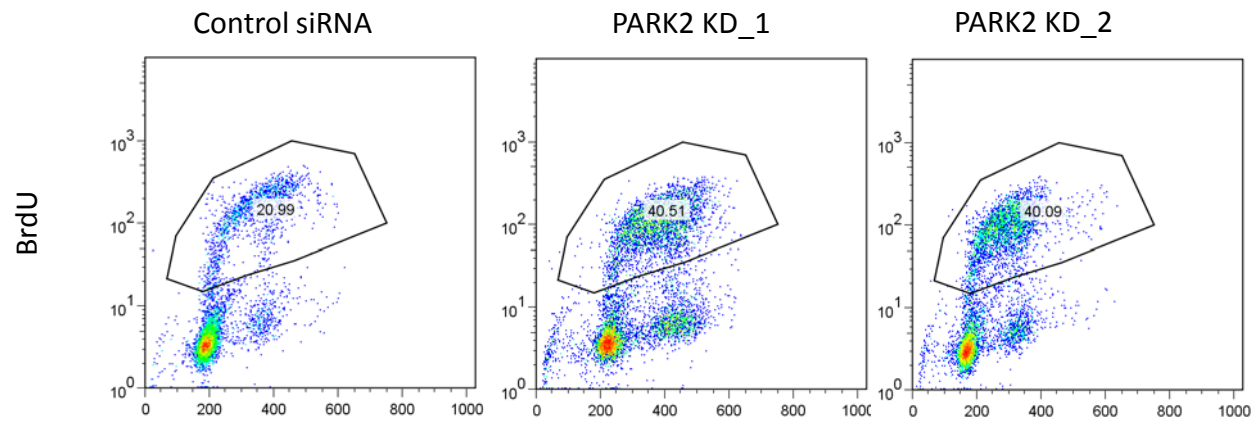

SNB19

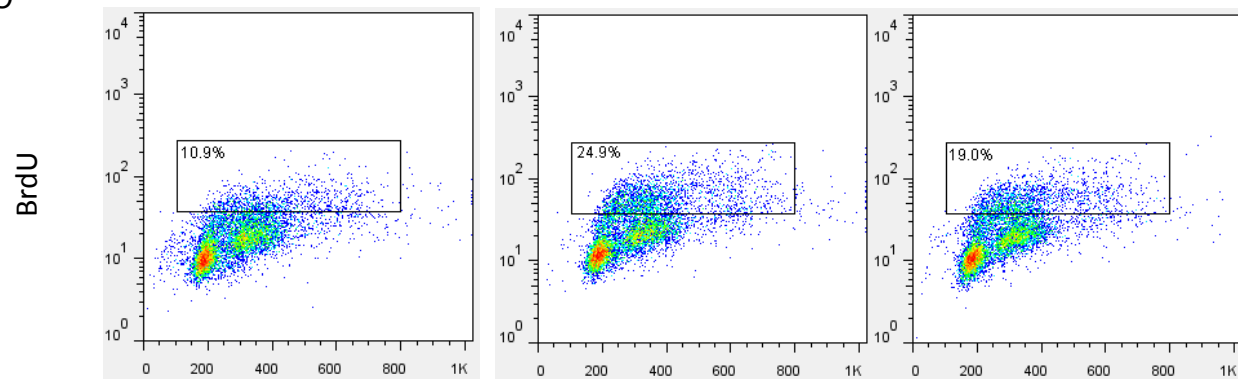

293FT

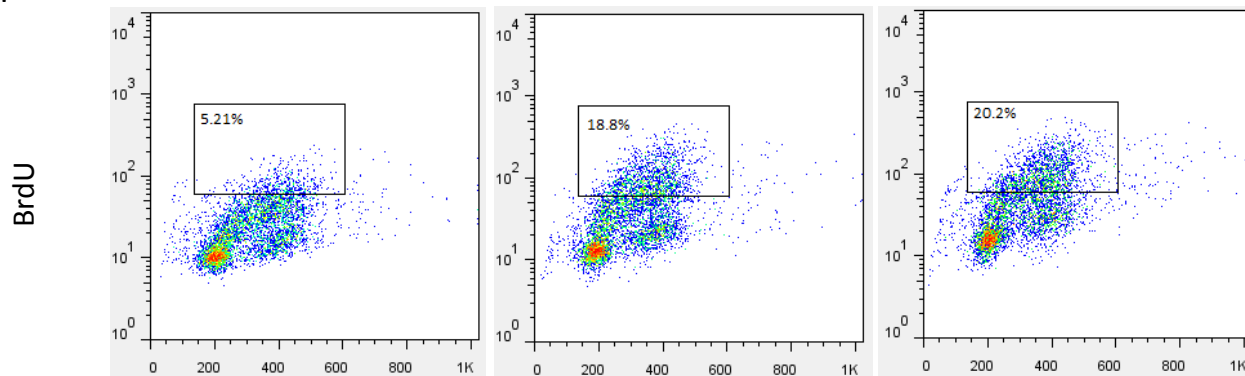

**Supplementary Figure 2** *PARK2* regulates cell cycle progression. FACS data from three cell lines as indicated. Cells were transfected with scrambled siRNA control or with *PARK2* siRNAs. DNA content and BrdU incorporation were measured after *PARK2* knockdown. Representative results are shown from triplicate experiments.

## SF539

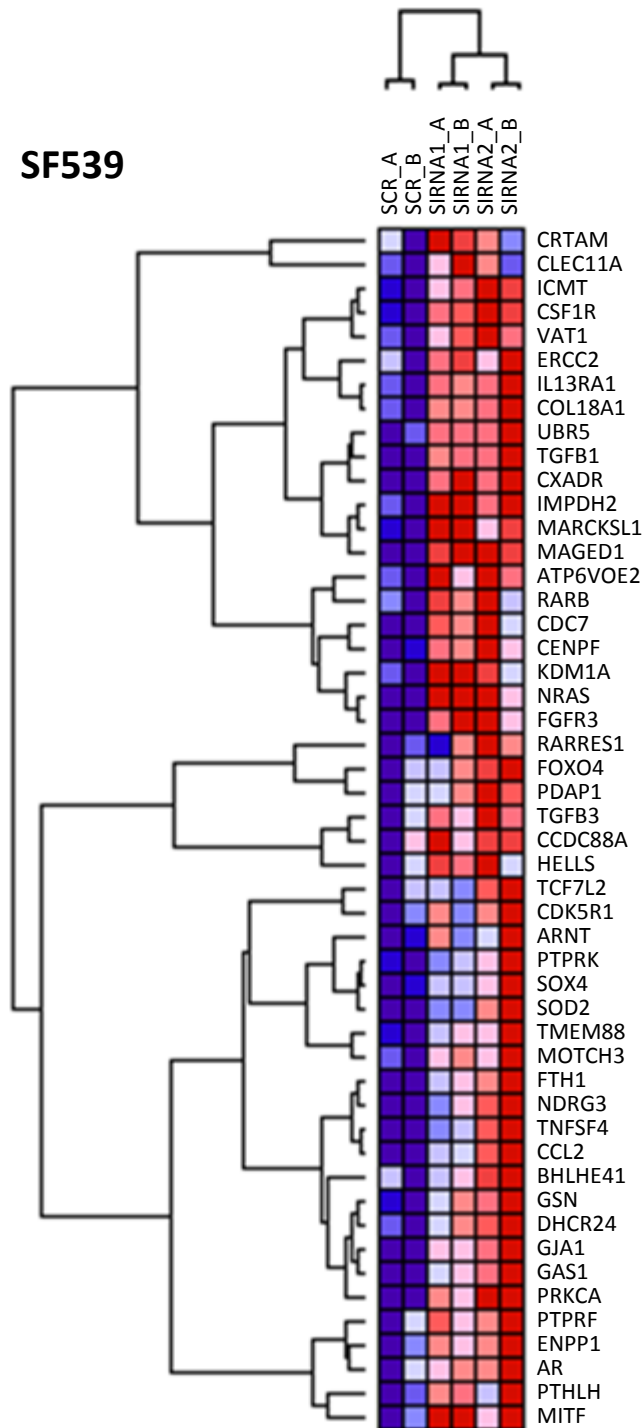

## SNB19

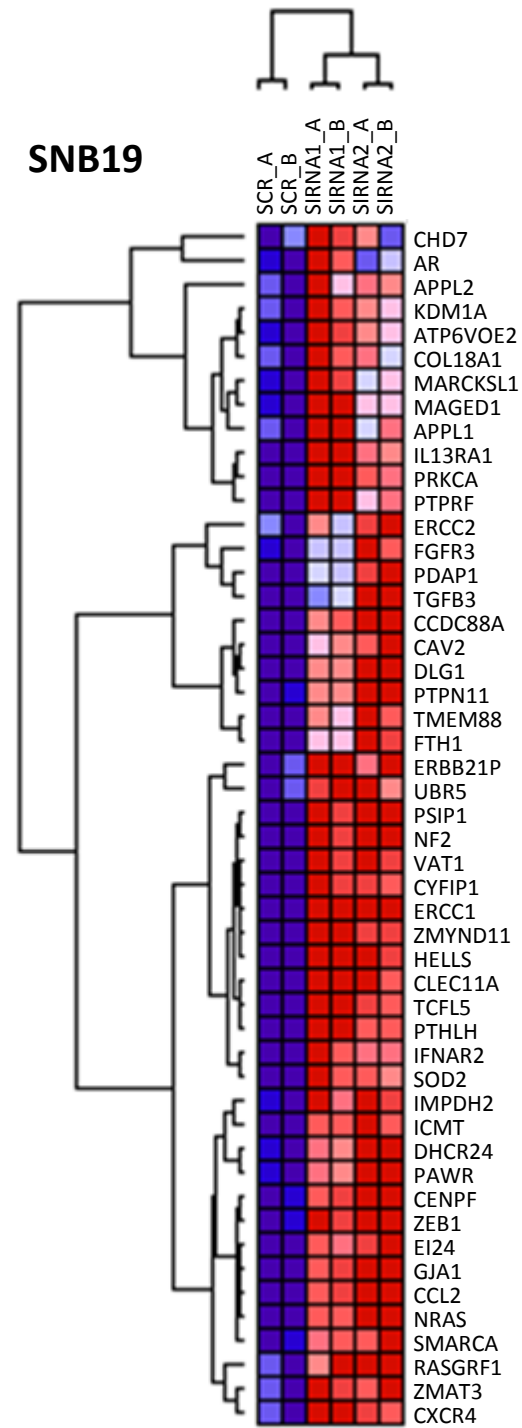

**Supplementary Figure 3** *PARK2* knockdown results in alterations in gene expression. The indicated cells were treated with scrambled siRNA or *PARK2* siRNA as shown. The heat map shows the top 50 genes with increased expression.

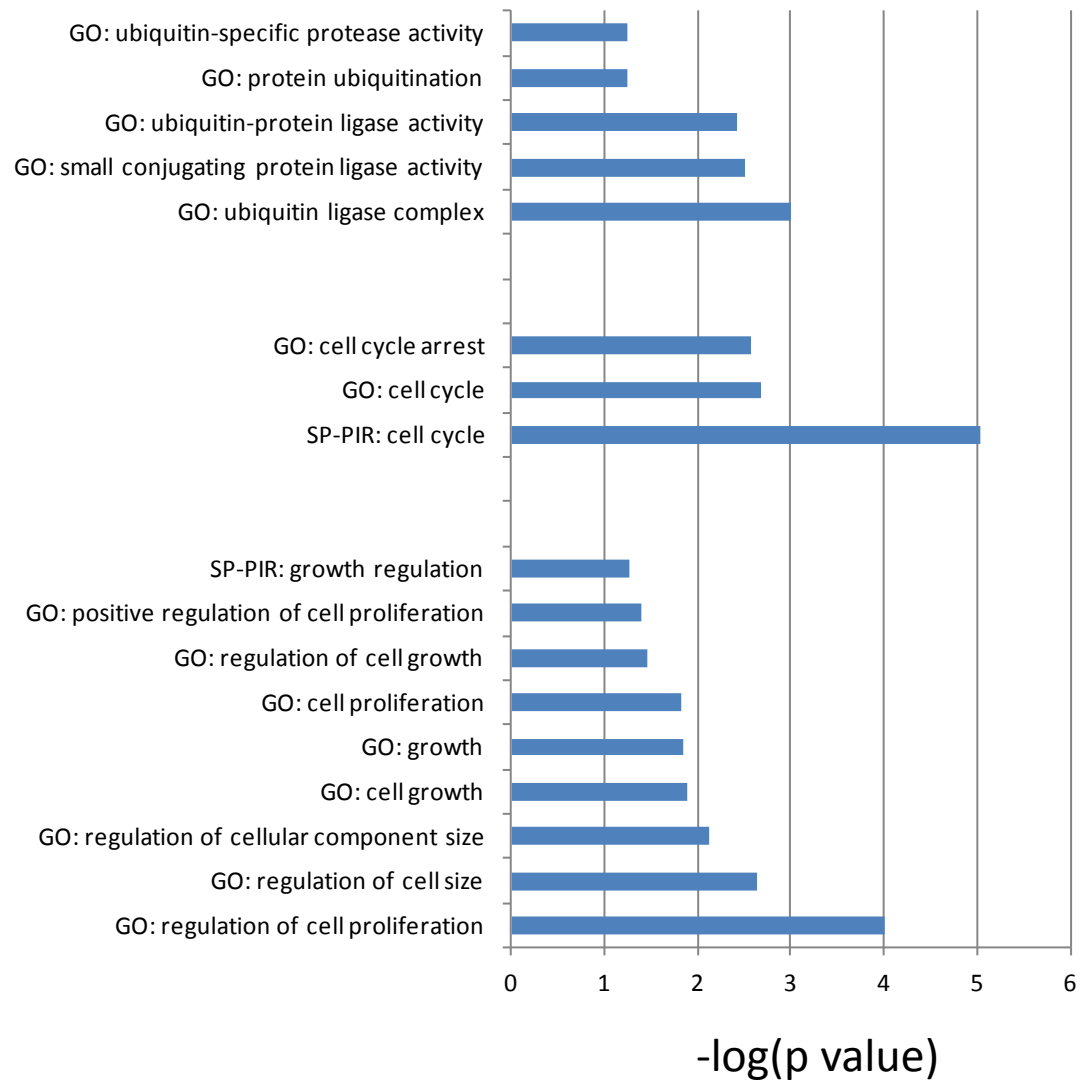

**Supplementary Figure 4** Pathway analyses of 2,698 genes differentially expressed across 2 cell lines transfected with *PARK2* siRNAs. Significant enrichment is shown in transcriptional programs governing cell growth, proliferation, protein ubiquitination, and cell cycle control.

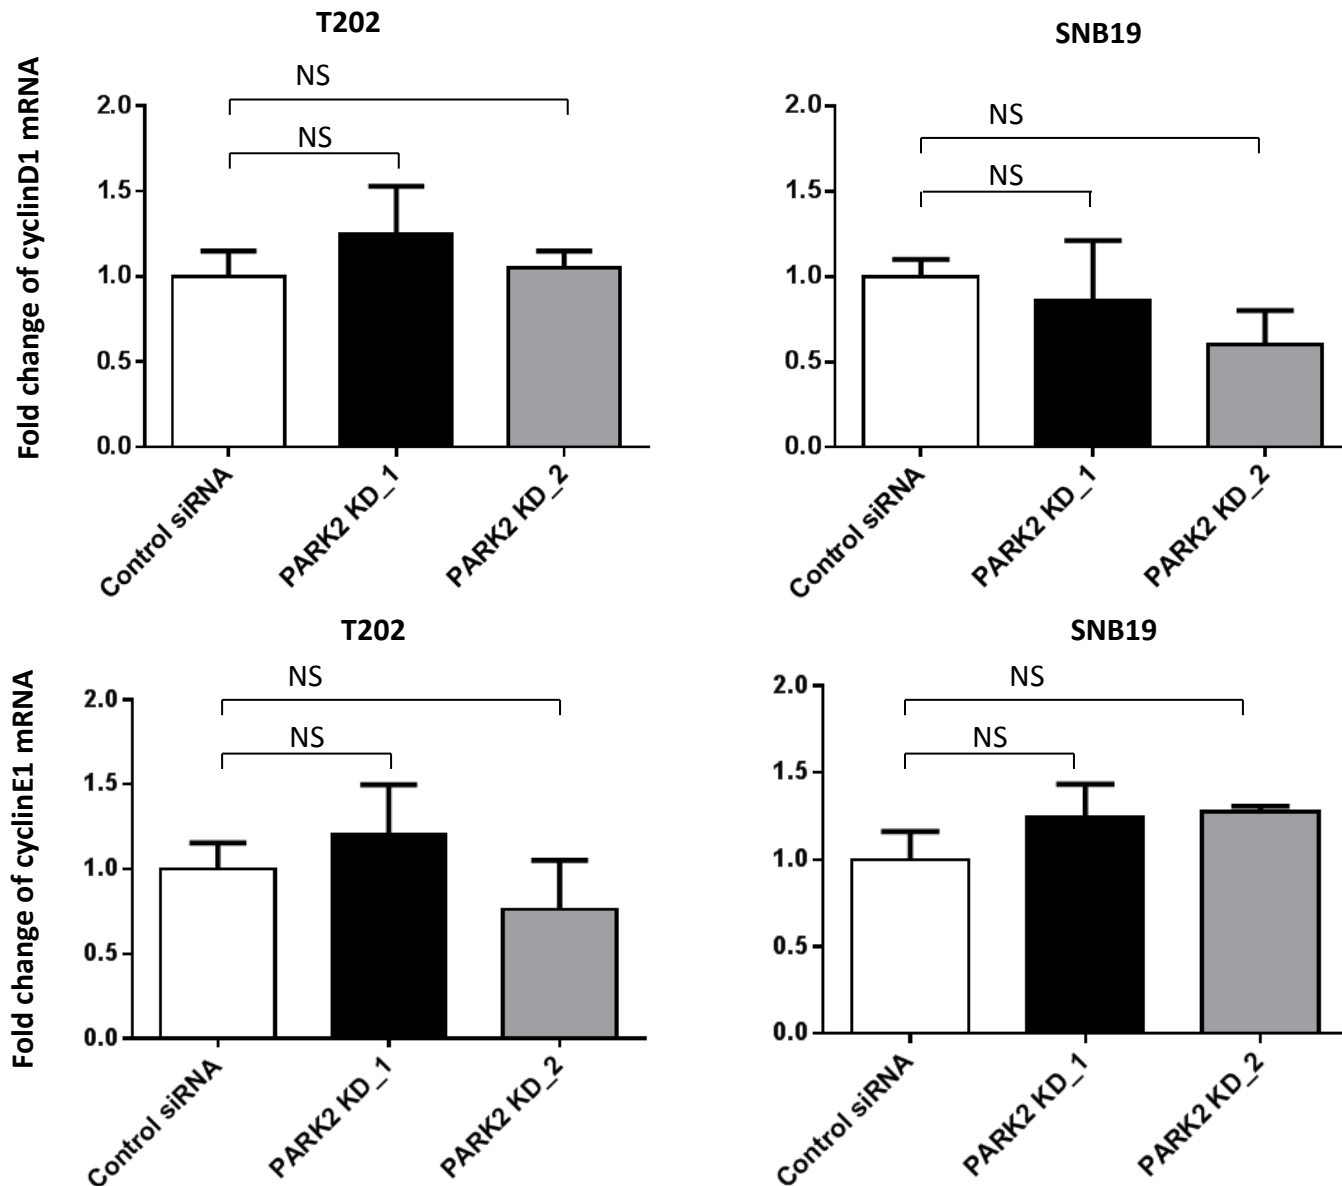

**Supplementary Figure 5** Gene expression does not change for cyclins D1 and E1 after *PARK2* knockdown. Two independent *PARK2* siRNAs were used. Experiments were repeated five times. Error bars, 1 standard deviation. NS, not significant.



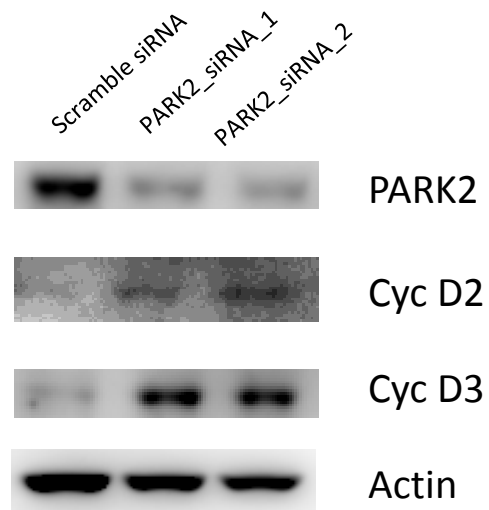

**Supplementary Figure 6** *PARK2* knockdown causes accumulation of cyclin D2 and D3 protein. T202 cells were transfected with scrambled siRNA control or with *PARK2* siRNAs and protein blots were performed with the antibodies specific for each cyclin type as indicated. Representative results are shown from triplicate experiments.

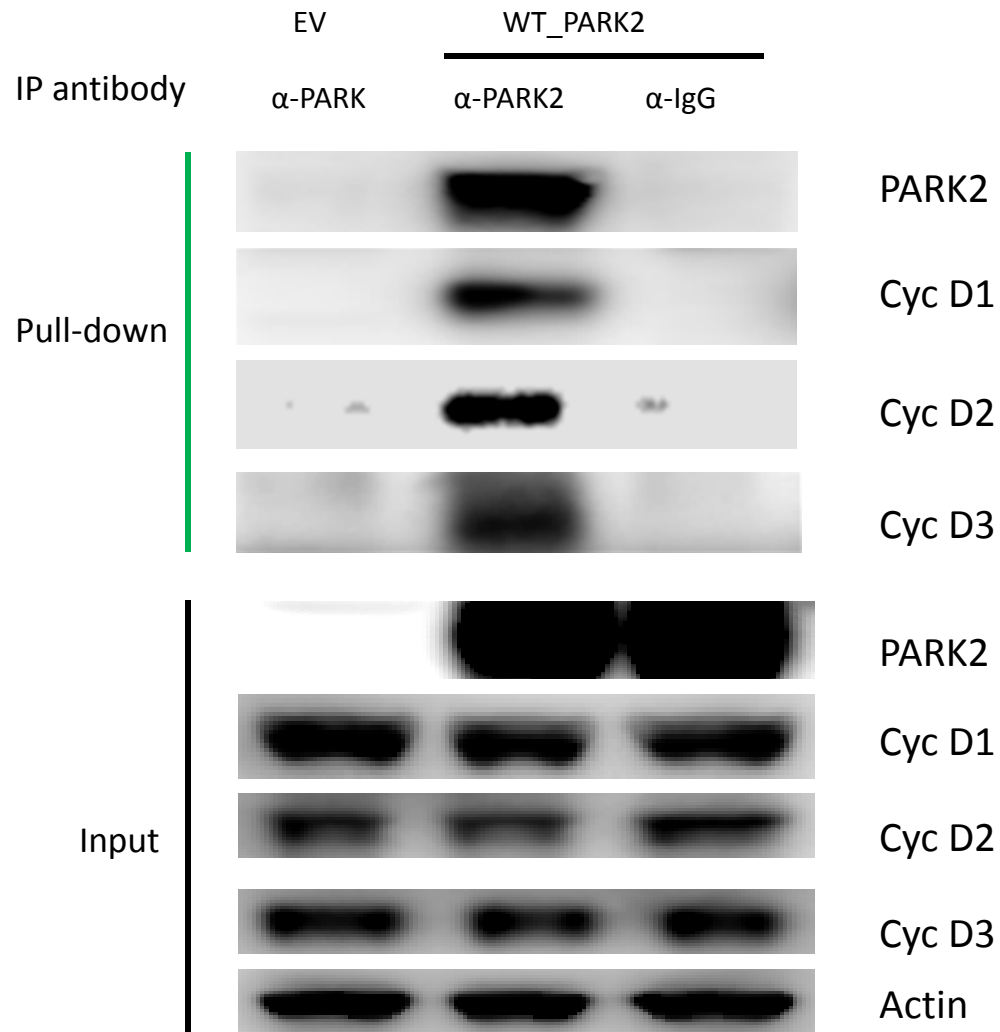

**Supplementary Figure 7** Immunoprecipitation assays show binding of wild-type PARK2 to endogenous cyclins D2 and D3. HEK 293T cells were transfected with either vector only (pcDNA3.1) or with vector encoding wild-type PARK2. Assays were performed as described in Online Methods.

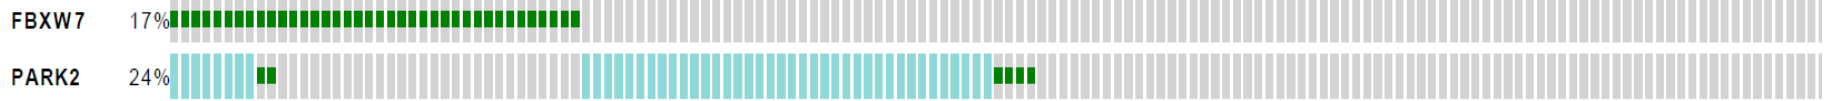

**Supplementary Figure 8** Patterns of genetic alteration of *FBXW7* and *PARK2* in colorectal cancer. In colorectal cancer, *FBXW7* is primarily mutated while *PARK2* is deleted and mutated. Shown are data from The Cancer Genome Atlas Project (<http://www.cbioportal.org/public-portal/>). Point mutations are noted in green and deletions are noted in blue. Percentages denote total numbers of tumors with alterations in the gene. *p*, not significant.

**Supplementary Table 1. Pan-cancer regions of significant SCNA and PARK2 anticorrelates**

**A) Amplification**

| Peak Name | Overall Gistic Rank | Genomic location      | Peak region               | GISTIC q-value | Gene count | Target(s)                                                  | Frequently mutated genes <sup>B</sup>             |
|-----------|---------------------|-----------------------|---------------------------|----------------|------------|------------------------------------------------------------|---------------------------------------------------|
| CCND1     | 1                   | 11q13.3               | chr11:69464719-69502928   | 2.05E-278      | 2          | <i>CCND1</i> <sup>K</sup>                                  | <i>CCND1</i> = 6.6e-08                            |
| EGFR      | 2                   | 7p11.2                | chr7:55075808-55093954    | 2.30E-240      | 1          | <i>EGFR</i> <sup>K</sup>                                   | <i>EGFR</i> = 2.2e-15                             |
| MYC       | 3                   | 8q24.21               | chr8:128739772-128762863  | 6.50E-180      | 1          | <i>MYC</i> <sup>K</sup>                                    |                                                   |
| TERC      | 4                   | 3q26.2                | chr3:169389459-169490555  | 5.40E-117      | 2          | <i>TERC</i> <sup>P</sup>                                   |                                                   |
| ERBB2     | 5                   | 17q12                 | chr17:37848534-37877201   | 1.59E-107      | 1          | <i>ERBB2</i> <sup>K</sup>                                  | <i>ERBB2</i> = 1.3e-06                            |
| CCNE1     | 6                   | 19q12                 | chr19:30306758-30316875   | 4.77E-90       | 1          | <i>CCNE1</i> <sup>K</sup>                                  |                                                   |
| MCL1      | 7                   | 1q21.3                | chr1:150496857-150678056  | 1.25E-80       | 6          | <i>MCL1</i> <sup>K</sup>                                   |                                                   |
| MDM2      | 8                   | 12q15                 | chr12:69183279-69260755   | 2.59E-62       | 2          | <i>MDM2</i> <sup>K</sup>                                   |                                                   |
| INTS4     | 9                   | 11q14.1               | chr11:77610143-77641464   | 1.01E-54       | 1          | <i>INTS4</i>                                               |                                                   |
| CDK4      | 11                  | 12q14.1               | chr12:58135797-58156509   | 5.14E-41       | 5          | <i>CDK4</i> <sup>K</sup>                                   | <i>CDK4</i> = 0.0048                              |
| SOX2      | 13                  | 3q26.33               | chr3:181151312-181928394  | 1.21E-38       | 2          | <i>SOX2</i> <sup>K</sup>                                   |                                                   |
| PDGFRA    | 14                  | 4q12                  | chr4:54924794-55218386    | 1.08E-37       | 3          | <i>PDGFRA</i> <sup>K</sup>                                 |                                                   |
| BDH1      | 15                  | 3q29                  | chr3:197212101-197335320  | 1.21E-31       | 1          | <i>BDH1</i> <sup>M</sup>                                   |                                                   |
| MDM4      | 17                  | 1q32.1                | chr1:204367383-204548517  | 1.98E-29       | 3          | <i>MDM4</i> <sup>K</sup>                                   |                                                   |
| TERT      | 18                  | 5p15.33               | chr5:1287704-1300024      | 9.34E-27       | 1          | <i>TERT</i> <sup>K</sup>                                   |                                                   |
| KDM5A     | 19                  | 12p13.33 <sup>T</sup> | chr12:1-980639            | 1.59E-25       | 11         | <i>KDM5A</i> <sup>E</sup>                                  |                                                   |
| MYCL1     | 20                  | 1p34.2                | chr1:40317971-40417342    | 3.99E-25       | 2          | <i>MYCL1</i> <sup>K</sup>                                  |                                                   |
| IGF1R     | 21                  | 15q26.3               | chr15:98667475-100292401  | 8.62E-25       | 9          | <i>IGF1R</i> <sup>K</sup>                                  |                                                   |
| BCL2L1    | 27                  | 20q11.21              | chr20:30179028-30320705   | 2.85E-15       | 4          | <i>BCL2L1</i> <sup>K</sup>                                 |                                                   |
| BRD4      | 32                  | 19p13.12              | chr19:15310246-15428182   | 5.04E-10       | 3          | <i>NOTCH3</i> <sup>P</sup> ,<br><i>BRD4</i> <sup>P,E</sup> |                                                   |
| KRAS      | 33                  | 12p12.1               | chr12:24880663-25722878   | 9.47E-10       | 7          | <i>KRAS</i> <sup>K</sup>                                   | <i>KRAS</i> = 1.5e-14                             |
| NKX2-1    | 34                  | 14q13.2               | chr14:35587755-37523513   | 1.33E-09       | 14         | <i>NKX2-1</i> <sup>K</sup>                                 | <i>NFKBIA</i> = 0.0098,<br><i>RALGAP1</i> = 0.027 |
| ZNF217    | 36                  | 20q13.2               | chr20:52148496-52442225   | 5.83E-08       | 1          | <i>ZNF217</i> <sup>K</sup>                                 | <i>ZNF217</i> = 0.0082                            |
| AKT1      | 48                  | 14q32.33              | chr14:105182581-105333748 | 0.00028451     | 7          | <i>AKT1</i> <sup>K</sup>                                   | <i>AKT1</i> = 1.1e-14                             |
| CDK6      | 49                  | 7q21.2                | chr7:92196092-92530348    | 0.00069831     | 3          | <i>CDK6</i> <sup>K</sup>                                   |                                                   |
| 6p21.1    | 50                  | 6p21.1                | chr6:41519930-44297771    | 0.0010459      | 70         |                                                            |                                                   |
| E2F3      | 56                  | 6p22.3                | chr6:19610794-22191922    | 0.0033658      | 7          | <i>E2F3</i> <sup>K</sup>                                   |                                                   |
| NEDD9     | 63                  | 6p24.2                | chr6:11180426-11620845    | 0.082606       | 2          | <i>NEDD9</i> <sup>K</sup>                                  |                                                   |
| PAX8      | 69                  | 2q13                  | chr2:113990138-114122826  | 0.19717        | 2          | <i>PAX8</i> <sup>K</sup>                                   |                                                   |

## B) Deletion

Blue indicates large gene

| Peak Name      | Overall Gistic Rank | Genomic location    | Peak region               | GISTIC q-value | Gene count | Target(s)                                                                                | Frequently mutated genes <sup>B</sup>                                                          |
|----------------|---------------------|---------------------|---------------------------|----------------|------------|------------------------------------------------------------------------------------------|------------------------------------------------------------------------------------------------|
| CDKN2A         | 1                   | 9p21.3              | chr9:21865498-22448737    | 0              | 4          | <i>CDKN2A</i> <sup>K</sup>                                                               | <i>CDKN2A</i> = 4.4e-15                                                                        |
| STK11          | 2                   | 19p13.3             | chr19:1103715-1272039     | 1.46E-238      | 7          | <i>STK11</i> <sup>K</sup>                                                                | <i>STK11</i> = 2.5e-13                                                                         |
| <i>PDE4D</i>   | 3                   | 5q11.2              | chr5:58260298-59787985    | 2.02E-143      | 3          | <i>PDE4D</i> <sup>L</sup>                                                                |                                                                                                |
| <i>PARK2</i>   | 4                   | 6q26                | chr6:161693099-163153207  | 5.85E-137      | 1          | <i>PARK2</i> <sup>L,K</sup>                                                              |                                                                                                |
| <i>LRP1B</i>   | 5                   | 2q22.1              | chr2:139655617-143637838  | 4.25E-107      | 1          | <i>LRP1B</i> <sup>L</sup>                                                                |                                                                                                |
| <i>CSMD1</i>   | 6                   | 8p23.2              | chr8:2079140-6262191      | 2.39E-96       | 1          | <i>CSMD1</i> <sup>L</sup>                                                                |                                                                                                |
| ARID1A         | 8                   | 1p36.11             | chr1:26900639-27155421    | 5.74E-87       | 2          | <i>ARID1A</i> <sup>K</sup>                                                               | <i>ARID1A</i> = 1.5e-14                                                                        |
| PTEN           | 9                   | 10q23.31            | chr10:89615138-90034038   | 1.12E-79       | 2          | <i>PTEN</i> <sup>K</sup>                                                                 | <i>PTEN</i> = 2.2e-15                                                                          |
| <i>WWOX</i>    | 10                  | 16q23.1             | chr16:78129058-79627770   | 8.14E-76       | 1          | <i>WWOX</i> <sup>L</sup>                                                                 | <i>WWOX</i> = 0.092                                                                            |
| RB1            | 11                  | 13q14.2             | chr13:48833767-49064807   | 3.88E-75       | 2          | <i>RBI</i> <sup>K</sup>                                                                  | <i>RB1</i> = 1.7e-13                                                                           |
| <i>FHIT</i>    | 17                  | 3p14.2              | chr3:59034763-61547330    | 3.01E-55       | 1          | <i>FHIT</i> <sup>L</sup>                                                                 |                                                                                                |
| <i>RBFOX1</i>  | 18                  | 16p13.3             | chr16:5144019-7771745     | 1.00E-45       | 1          | <i>RBFOX1</i> <sup>L</sup>                                                               |                                                                                                |
| <i>PTPRD</i>   | 19                  | 9p24.1              | chr9:8310705-12693402     | 3.24E-38       | 1          | <i>PTPRD</i> <sup>L</sup>                                                                |                                                                                                |
| FAT1           | 21                  | 4q35.2              | chr4:187475875-188227950  | 6.81E-36       | 1          | <i>FAT1</i> <sup>K</sup>                                                                 | <i>FAT1</i> = 2.4e-15                                                                          |
| NF1            | 26                  | 17q11.2             | chr17:29326736-29722618   | 6.59E-23       | 5          | <i>NF1</i> <sup>K</sup>                                                                  | <i>NF1</i> = 3.3e-13                                                                           |
| <i>MACROD2</i> | 27                  | 20p12.1             | chr20:14302876-16036135   | 9.00E-19       | 3          | <i>MACROD2</i> <sup>L</sup>                                                              |                                                                                                |
| 5q15           | 33                  | 5q15                | chr5:73236070-114508587   | 8.15E-13       | 156        | <i>APC</i> <sup>K</sup> ,<br><i>CHD1</i> <sup>E</sup>                                    | <i>APC</i> =2.6e-13,<br><i>RASA1</i> =0.0029                                                   |
| MLL3           | 34                  | 7q36.1              | chr7:151817415-152136074  | 9.26E-13       | 1          | <i>MLL3</i> <sup>K,E</sup>                                                               | <i>MLL3</i> = 1.1e-05                                                                          |
| IKZF2          | 41                  | 2q34                | chr2:211542637-214143899  | 3.24E-09       | 4          | <i>IKZF2</i> <sup>K</sup> ,<br><i>ERBB4</i> <sup>L</sup>                                 | <i>ERBB4</i> = 0.00058                                                                         |
| <i>CNTN4</i>   | 42                  | 3p26.3 <sup>T</sup> | chr3:1-3100786            | 6.44E-09       | 3          | <i>CNTN4</i> <sup>L</sup>                                                                |                                                                                                |
| 3p12.2         | 43                  | 3p12.2              | chr3:75363575-86988125    | 1.22E-07       | 12         | <i>ROBO1</i> <sup>L</sup> ,<br><i>CADM2</i> <sup>L</sup>                                 |                                                                                                |
| <i>RAD51B</i>  | 44                  | 14q24.1             | chr14:68275375-69288431   | 1.38E-07       | 2          | <i>RAD51B</i> <sup>L</sup>                                                               | <i>ZFP36L1</i> = 0.0016                                                                        |
| 11q23.1        | 45                  | 11q23.1             | chr11:105849158-117024891 | 5.31E-07       | 84         | <i>ATM</i> <sup>K</sup>                                                                  | <i>ATM</i> =1.4e-06,<br><i>POU2AF1</i> =0.082                                                  |
| <i>IMMP2L</i>  | 46                  | 7q31.1              | chr7:109599468-111366370  | 5.74E-07       | 2          | <i>IMMP2L</i> <sup>L</sup>                                                               |                                                                                                |
| <i>NEGR1</i>   | 47                  | 1p31.1              | chr1:71699756-74522473    | 7.25E-07       | 2          | <i>NEGR1</i> <sup>L</sup>                                                                |                                                                                                |
| BRCA1          | 48                  | 17q21.31            | chr17:41178765-41336147   | 7.25E-07       | 2          | <i>BRCA1</i> <sup>K</sup>                                                                | <i>BRCA1</i> = 3.5e-08                                                                         |
| 9q34.3         | 49                  | 9q34.3              | chr9:135441810-139646221  | 8.73E-06       | 94         | <i>NOTCH1</i> <sup>K</sup> ,<br><i>BRD3</i> <sup>E</sup> ,<br><i>GTF3C4</i> <sup>E</sup> | <i>NOTCH1</i> =1e-08,<br><i>RXRA</i> =2.1e-05,<br><i>COL5A1</i> =0.0022,<br><i>TSC1</i> =0.012 |

|               |    |          |                          |            |   |                            |                         |
|---------------|----|----------|--------------------------|------------|---|----------------------------|-------------------------|
| <i>ANKS1B</i> | 50 | 12q23.1  | chr12:99124001-100431272 | 8.73E-06   | 2 | <i>ANKS1B</i> <sup>L</sup> |                         |
| <i>DMD</i>    | 51 | Xp21.2   | chrX:30865118-34644819   | 5.15E-05   | 4 | <i>DMD</i> <sup>L</sup>    |                         |
| <i>PRKG1</i>  | 53 | 10q11.23 | chr10:52644085-54061437  | 9.79E-05   | 3 | <i>PRKG1</i> <sup>L</sup>  |                         |
| <i>AGBL4</i>  | 55 | 1p33     | chr1:48935280-50514967   | 0.000219   | 2 | <i>AGBL4</i> <sup>L</sup>  |                         |
| <i>CDKN1B</i> | 56 | 12p13.1  | chr12:12710990-12966966  | 0.00035777 | 5 | <i>CDKN1B</i> <sup>K</sup> | <i>CDKN1B</i> = 2.2e-06 |
| <i>SMAD4</i>  | 63 | 18q21.2  | chr18:48472083-48920689  | 0.036866   | 3 | <i>SMAD4</i> <sup>K</sup>  | <i>SMAD4</i> = 6.6e-15  |

### Notes

<sup>B</sup>GENE = p-value from [Lawrence et al. *unpublished data*] corrected to FDR within peak

<sup>K</sup>Known frequently amplified oncogene or deleted TSG

<sup>P</sup>Putative cancer gene

<sup>E</sup>Epigenetic regulator

<sup>M</sup>Mitochondria-associated gene

\*\*Immediately adjacent to peak region

<sup>T</sup>Adjacent to telomere or centromere of acrocentric chromosome

## Supplementary Table 2. Significance of PARK2 anticorrelates

### A) Amplification

| p-value  | gene1  | gene2 | q-value  |
|----------|--------|-------|----------|
| 0.012143 | PAX8   | PARK2 | 0.181759 |
| 0.004796 | CCND1  | PARK2 | 0.113663 |
| 0.016531 | CDK4   | PARK2 | 0.215656 |
| 0.0001   | CCNE1  | PARK2 | 0.009673 |
| 0.000204 | BCL2L1 | PARK2 | 0.016122 |

### B) Deletion

| p-value  | gene1 | gene2 | FDR p-value |
|----------|-------|-------|-------------|
| 0.004184 | PARK2 | BRCA1 | 0.108167    |

Note: q-value of <0.25 is significant

**Supplementary Table 5. Quantitative RT-PCR Primer and siRNA target sequences**

| <b>Name</b>  | <b>Oligonucleotide sequence (5' -&gt; 3')</b> |
|--------------|-----------------------------------------------|
| siRNAs       |                                               |
| siPARK2_1    | AGTGCCGTATTTGAAGCCTCAGGAACAAC                 |
| siPARK2_2    | GTACGCTTCTTTACATTCCCGGCAGAAGG                 |
| siFBX4_1     | GCCGGTACAGTGTGATTCCACAGATTCAA                 |
| siFBX4_2     | GGCATTGAGTGGATTCTTGAAGAAGTGA                  |
| siFBXW7_1    | ACAGGACAGTGTTTACAAATT                         |
| siFBXW7_2    | GTGAAGTTGTTGGAGTAGATT                         |
| qPCR primers |                                               |
| cyclin D1_F  | CTGGCCATGAACTACCTGGA                          |
| cyclin D1_R  | GTCACACTTGATCACTCTGG                          |
| cyclin E1_F  | GTTATAAGGGAGACGGGGAG                          |
| cyclin E1_R  | TGCTCTGCTTCTTACCGCTC                          |
| GAPDH_F      | AATGAAGGGGTCATTGATGG                          |
| GAPDH_R      | AAGGTGAAGGTCGGAGTCAA                          |
